# Supplementary material for: A scalable stable porous coordination polymer synthesized from low-cost precursors for efficient C2H2/C2H4 separation
Source: Royal Society of Chemistry journal article supplement (doi:10.1039/d3gc01114c), 2023-01-01
Supplement: d3gc01114c1.pdf [file d3gc01114c1.pdf]

## Supplementary Information for

### **A Scalable Stable Porous Coordination Polymer Synthesized from Low-cost Precursors for Efficient C<sub>2</sub>H<sub>2</sub>/C<sub>2</sub>H<sub>4</sub> Separation**

*Hengcong Huang<sup>#</sup>, Yifan Gu<sup>#</sup>, Luyao Wang, Tao Jia, Susumu Kitagawa, Fengting Li<sup>\*</sup>*

#### **Experimental Section**

##### **1. Materials and Synthesis**

Nickel Nitrate Hexahydrate [Ni(NO<sub>3</sub>)<sub>2</sub>·6H<sub>2</sub>O], methanol (MeOH), *N,N*-dimethylacetamide (DMA), *N,N*-dimethylformamide (DMF), ethanol (EtOH), nitric acid (HNO<sub>3</sub>) and sodium hydroxide (NaOH) were purchased from Sinopharm Chemical Reagent Co., Ltd. 4-pyrazolecarboxylic acid (pca) and pyrazine (pyz) were purchased from WuXi AppTec Co., Ltd.

All chemicals and solvents were used without further purification. Deionized water was used throughout this work. N<sub>2</sub>, CO<sub>2</sub>, C<sub>2</sub>H<sub>2</sub>, C<sub>2</sub>H<sub>4</sub>, C<sub>2</sub>H<sub>6</sub>, and He were purchased from Air Liquide Co., Ltd with a purity of 99.99%.

**Synthesis of TJE-1 single crystals.** Firstly, 72.7 mg (0.25 mmol) Ni(NO<sub>3</sub>)<sub>2</sub>·6H<sub>2</sub>O and 28 mg (0.25 mmol) pca were dissolved in DMA/MeOH (1:1, 20 mL). Then, 20 mg (0.25 mmol) pyz was added to the above solution. Then the mixture was heated at 90 °C for 36 hours to yield green single crystal of TJE-1.

**Conventional synthesis of TJE-1 microcrystalline samples.** Firstly, 697.9 mg (2.4 mmol) Ni(NO<sub>3</sub>)<sub>2</sub>·6H<sub>2</sub>O and 268.8 mg (2.4 mmol) pca were dissolved in DMF/MeOH (1:1, 60 mL). Then, 192 mg (2.4 mmol) pyz were added to the above solution. Then the mixture was transferred to a 100 mL sealed vial and heated at 90 °C for 36 hours to yield TJE-1 microcrystalline samples. PXRD analysis results indicated that the as-synthesized powder is of the same phase as the single crystal of TJE-1. To obtain fully desolvated TJE-1, the as-synthesized samples were washed

three times with 10 mL methanol. The solvent was decanted and replaced with 10 mL of fresh MeOH twice a day for 5 days. Finally, the samples were dried under vacuum at 80 °C for 24 hours to obtain activated TJE-1. TGA analysis results indicated that all guest solvents were completely removed.

**Scale-up synthesis of TJE-1.** Firstly, 50.6 g (450 mmol) pca and 41.48 g (518 mmol) pyz were dissolved in DMF/MeOH (1:1, 9 L) in a 10 L sealed vessel. Then, 133.3 g (458 mmol) Ni(NO<sub>3</sub>)<sub>2</sub>·6H<sub>2</sub>O was added to the above solution and dissolved. Then the mixture was heated at 80 °C for 36 hours to yield powder of TJE-1. The as-synthesized samples were washed three times with 1 L H<sub>2</sub>O. The solvent was decanted and replaced with 5 L of fresh H<sub>2</sub>O for 5 days and 2 L of MeOH for 2 days. Finally, the samples were dried under vacuum at 100 °C for 36 hours with a yield of 60.1 g (53.8% based on pca).

**Explanation of use of solvents.** DMF is a common solvent for the production of PCPs because the carboxylic acid groups in the ligands need to be deprotonated before they can be coordinated.<sup>1</sup> Solvents have been optimized in this study by using equal volumes of mixed DMF and MeOH instead of pure DMF. In the subsequent solvent exchange, water can be used to avoid the use of solvents such as acetone and dichloromethane.

## 2. General methods

Powder X-ray diffraction (PXRD) measurements were carried out with a Bruker D8 Advance X-Ray powder diffractometer (40 kV, 40 mA, Cu K $\alpha$ 1 radiation of  $\lambda = 1.54059 \text{ \AA}$ ) at room temperature. The thermogravimetry analysis (TGA) curves were obtained from Water (Discovery TGA) at a constant rate of 5 °C/min from 50 °C to 500 °C in flowing N<sub>2</sub> gas. Scanning electron microscopic (SEM) images were taken on ZEISS Sigma 300 scanning electron microscope equipped with Oxford Xplore 30 energy dispersive X-ray spectrometer (EDX) system. X-ray photoelectron spectroscopic (XPS) experiments were carried out by Thermo Scientific K-Alpha using monochromatic Al K $\alpha$  ( $h\nu=1486.6 \text{ eV}$ ). Binding energies were calibrated by using the containment carbon (C1s = 284.8 eV).

### 3. Single-crystal X-ray crystallography

Suitable crystals of as-synthesized TJE-1 were selected for single crystal X-ray data collections on a Bruker D8 VENTURE Metaljet PHOTON III diffractometer. The crystal was kept at 300.00 K during data collection. Using Olex2<sup>2</sup>, the structure was solved with the SHELXT<sup>3</sup> structure solution program using Intrinsic Phasing and refined with the SHELXL<sup>4</sup> refinement package using Least Squares minimization. Crystallographic data and structural refinement summary are summarized in Table S2. Crystallographic data in CIF format have been deposited in the Cambridge Crystallographic Data Centre (CCDC) under deposition number CCDC-2181192. The data can be obtained free of charge via [www.ccdc.cam.ac.uk/data\\_request/cif](http://www.ccdc.cam.ac.uk/data_request/cif) (or from the Cambridge Crystallographic Data Centre, 12 Union Road, Cambridge CB2 1EZ, U.K.).

### 4. Gas sorption isotherms and breakthrough experiments

The gas sorption curves of N<sub>2</sub>, C<sub>2</sub>H<sub>2</sub>, C<sub>2</sub>H<sub>4</sub>, C<sub>2</sub>H<sub>6</sub>, and CO<sub>2</sub> were measured by BEL-max (Microtrac BEL Corp., Japan) gas adsorption instruments. Before all of the gas sorption and breakthrough separation experiments, samples were reactivated at 80 °C under vacuum for over 8 hours. Between each cycle of continuous C<sub>2</sub>H<sub>2</sub> sorption measurements, the PCPs were regenerated by in situ vacuuming without heating. The temperatures of 77 K, 273 K, and 298 K were maintained with a liquid nitrogen bath or constant temperature water bath.

The Brunauer–Emmett–Teller (BET) surface areas and pore size distribution data were calculated from the N<sub>2</sub> adsorption isotherms at 77 K based on the BET method and Horvath–Kawazoe method (pore geometry: slit), respectively, in the BELMaster (ver. 7.3.1.0) software package.

The breakthrough experiments were carried out in BSD-MAB (Beishide Instrument Technology (Beijing) Co., Ltd.). In a conventional binary component experiment, 0.8 g of TJE-1 sample was packed into a stainless-steel column with an inner diameter of 6 mm and sample loading length of 58 mm. The column packed with samples was first purged with a flow of He (30 mL min<sup>-1</sup>) at 80 °C for 2 h. Upon

cooling to 298 K, the equimolar C<sub>2</sub>H<sub>2</sub>/C<sub>2</sub>H<sub>4</sub> gas mixture with a total flow rate of 2 mL min<sup>-1</sup> was introduced to the column. For the scale-up synthesized sample experiment, ~56 g of TJE-1 sample was packed into a stainless-steel column with an inner diameter of 24.0 mm and sample loading length of 188 mm. Then the column was purged with He (10 mL min<sup>-1</sup>) at 100 °C for 2 h and an equimolar C<sub>2</sub>H<sub>2</sub>/C<sub>2</sub>H<sub>4</sub> gas mixture with a total flow rate of 10 mL min<sup>-1</sup> was introduced to the column. Outlet effluent from the column was continuously monitored by an online mass spectrometry detector inside BSD-MAB.

The separation factor (*S*) of component 1 to component 2 is calculated by:

$$S = \left( \frac{X_1}{X_2} \right) / \left( \frac{Y_1}{Y_2} \right)$$

where *X*<sub>1</sub> and *Y*<sub>1</sub> are the molar fraction of component 1 in the adsorption phase and molar fraction of component 1 in the gas phase, respectively, *X*<sub>2</sub> and *Y*<sub>2</sub> are molar fraction of component 2 in the adsorption phase and molar fraction of component 2 in the gas phase, respectively.

The C<sub>2</sub>H<sub>4</sub> productivity (*q*) is defined by the breakthrough amount of C<sub>2</sub>H<sub>4</sub>, which is calculated by integration of the breakthrough curves *f*(*t*) from *t*<sub>1</sub>(18.55 min g<sup>-1</sup>) to *t*<sub>2</sub>(37.53 min g<sup>-1</sup>) where the C<sub>2</sub>H<sub>4</sub> purity >99.95%:

$$q = \frac{C_i(\text{C}_2\text{H}_4)}{C_i(\text{C}_2\text{H}_4) + C_i(\text{C}_2\text{H}_2)} \times \int_{t_1}^{t_2} f(t) dt$$

For ternary components breakthrough experiment, generally, ~0.3 g of TJE-1 sample was packed into a stainless-steel column with an inner diameter of 4 mm and a sample loading length of 29 mm. The column packed with samples was first purged with a flow of He (20 mL min<sup>-1</sup>) at 100 °C for 2 h. Upon cooling to 298 K, the C<sub>2</sub>H<sub>2</sub>/C<sub>2</sub>H<sub>4</sub>/X (X=CO or CO<sub>2</sub>) (45/45/10,v/v/v) gas mixture with a total flow rate of 2 mL min<sup>-1</sup> was introduced to the column. Outlet effluent from the column was continuously monitored by an online mass spectrometry detector inside BSD-MAB.

## 5. Stability test

To demonstrate the water stability of TJE-1, the activated 0.2 g TJE-1 was immersed in 20 mL water for 10 days. After that, the sample was filtered and dried under vacuum at 100 °C for 24 hours to obtain the reactivated sample. PXRD and C<sub>2</sub>H<sub>2</sub> gas sorption curves of the reactivated TJE-1 were measured to reveal its water stability.

Moreover, to demonstrate the hot water stability of TJE-1, the activated 0.2 g TJE-1 was immersed in 20 mL water and then put in an oil bath at 80 °C. After 3 days, the samples were filtered and PXRD was measured to reveal its hot water stability.

To demonstrate the stability of TJE-1 in other situations, the activated 0.2 g TJE-1 was respectively immersed in 20 mL 0.1 M NaOH (pH=14), 0.01 M HNO<sub>3</sub> (pH=2), methanol, and ethanol for 10 days, or exposed to the air for 90 days. All the samples were filtered and PXRD was measured to reveal their stability.

## 6. Calculation of isosteric enthalpy of adsorption ( $Q_{st}$ )

The below virial-type equation was used to fit the C<sub>2</sub>H<sub>2</sub> and C<sub>2</sub>H<sub>2</sub> adsorption isotherm data for TJE-1 at 273 and 298 K:

$$\ln P = \ln q + \frac{1}{T} \sum_{i=0}^m a_i q^i + \sum_{i=0}^n \binom{n}{k} b_i q^i$$

where  $P$  is the pressure (Pa),  $q$  is the adsorbed amount (mmol/g),  $T$  is the temperature (K),  $a_i$  and  $b_i$  are virial coefficients, and  $m$  and  $n$  are the numbers of coefficients used to describe the isotherms. The fitting parameters are summarized in Table S4.

$Q_{st}$  is the coverage-dependent enthalpy of adsorption and is defined as:

$$Q_{st} = -R \sum_{i=0}^m a_i q^i$$

where  $R$  is the gas constant (8.314 J mol<sup>-1</sup> K<sup>-1</sup>).

## 7. Calculation of IAST selectivity

The selectivity for the adsorbate mixture composition was calculated from the single-component adsorption isotherms according to the ideal adsorbed solution

theory (IAST). First, the pure component isotherm data for C<sub>2</sub>H<sub>2</sub> and C<sub>2</sub>H<sub>4</sub> at 298 K were fitted to the dual-site Langmuir-Freundlich equation:

$$q = n_{m1} \frac{b_1 P^{(1/t_1)}}{1 + b_1 P^{(1/t_1)}} + n_{m2} \frac{b_2 P^{(1/t_2)}}{1 + b_2 P^{(1/t_2)}}$$

where  $q$  is the amount adsorbed per mass of material (mmol/g);  $P$  is the total pressure (kPa) of the bulk gas at equilibrium with the adsorbed phase;  $n_{m1}$  and  $n_{m2}$  are the saturation uptakes (mmol/g) for sites 1 and 2, respectively;  $b_1$  and  $b_2$  are the affinity coefficients (kPa<sup>-1</sup>) for sites 1 and 2, respectively; and  $t_1$  and  $t_2$  represent the deviations from the ideal homogeneous surface (dimensionless) for sites 1 and 2, respectively. The fitted parameter values for C<sub>2</sub>H<sub>2</sub> and C<sub>2</sub>H<sub>4</sub> are presented in Table S3 with R<sup>2</sup> > 0.999.

Finally, the selectivity for adsorbate  $i$  relative to adsorbate  $j$  was calculated using the following equation:

$$S_{i/j} = \frac{x_i y_j}{x_j y_i}$$

where  $x_i$  and  $x_j$  are the mole fractions of components  $i$  (C<sub>2</sub>H<sub>2</sub>) and  $j$  (C<sub>2</sub>H<sub>4</sub>) in the adsorbed phase in equilibrium, respectively, and  $y_i$  and  $y_j$  are the mole fractions of components  $i$  and  $j$  in the gas phase in equilibrium, respectively.

## 8. Calculation of separation potential

The separation potential ( $\Delta q$ ) was calculated based on IAST by shock wave model<sup>5,6</sup>:

$$\Delta q = q_A \frac{y_B}{1 - y_B} \left( 1 - \frac{1}{S_{A/B}} \right)$$

where  $y_B$  is the mole fraction of C<sub>2</sub>H<sub>4</sub> (B) entering the fixed bed and  $q_A$  is the uptake capacities of C<sub>2</sub>H<sub>2</sub> (A) within the MOF that is in equilibrium with a bulk gas phase with partial pressures  $p_A$ .  $S_{A/B}$  is the IAST selectivity under the same conditions. Because the derivation of the separation potential  $\Delta q$  is based on an idealized shock wave model, it represents the maximum productivity of the ethylene that can be recovered.

## 9. DFT calculation

First-principles density functional theory (DFT) calculation was employed to describe the adsorption energies and function sites of C<sub>2</sub>H<sub>2</sub> and C<sub>2</sub>H<sub>4</sub> into TJE-1. The first principle calculations are performed by Vienna Ab initio Simulation Package(VASP) with the projector augmented wave (PAW) method.<sup>7, 8</sup> The exchange-functional is treated using the Perdew-Burke-Ernzerhof (PBE) functional, in combination with the DFT-D3 correction.<sup>9</sup> The calculations were performed in a spin-polarized manner. The cell parameters were  $a = 13.443 \text{ \AA}$ ,  $b = 13.443 \text{ \AA}$ ,  $c = 7.113 \text{ \AA}$ ,  $\alpha = 90.00^\circ$ ,  $\beta = 90.00^\circ$ ,  $\gamma = 90.00^\circ$ , which are all consistent with the SCXRD results and demonstrated the accuracy of the calculation method. The cut-off energy of the plane-wave basis is set at 400 eV. For the optimization of both geometry and lattice size, the Brillouin zone integration is performed with 3\*3\*1 Monkorts-Pack kpoint sampling.<sup>10</sup> The self-consistent calculations apply a convergence energy threshold of 10<sup>-5</sup> eV. The equilibrium geometries and lattice constants are optimized with maximum stress on each atom within 0.02 eV/Å.

The binding energies (BE) of C<sub>2</sub>H<sub>2</sub> and C<sub>2</sub>H<sub>4</sub> with TJE-1 were calculated using:

$$BE = E(nG \subseteq PCP)_{eq} - E(PCP)_{eq} - nE(G)_{eq}$$

where  $E(nG \subseteq PCP)_{eq}$  is the total energy of TJE-1 absorbed  $n$  gas molecules ( $G = \text{C}_2\text{H}_2$  or  $\text{C}_2\text{H}_4$ ) per unit cell,  $E(PCP)_{eq}$  and  $E(G)_{eq}$  are the total energies of empty TJE-1 and one free guest molecule, respectively, and the subscript “eq” represents the equilibrium state.

**Table S1.** Molecular size and boiling points of C<sub>2</sub>H<sub>2</sub> and C<sub>2</sub>H<sub>4</sub>.<sup>11, 12</sup>

| Gas                                                              | C <sub>2</sub> H <sub>2</sub> | C <sub>2</sub> H <sub>4</sub> |
|------------------------------------------------------------------|-------------------------------|-------------------------------|
| Molecular dimension (Å)                                          | 3.32×3.34×5.70                | 3.28×4.18×4.84                |
| Boiling points (K)                                               | 188.4                         | 169.4                         |
| Quadrupole moment<br>(×10 <sup>26</sup> e.s.u. cm <sup>2</sup> ) | 3.0                           | 1.5                           |
| Polarizability (×10 <sup>-25</sup> cm <sup>3</sup> )             | 33.3-39.3                     | 42.5                          |



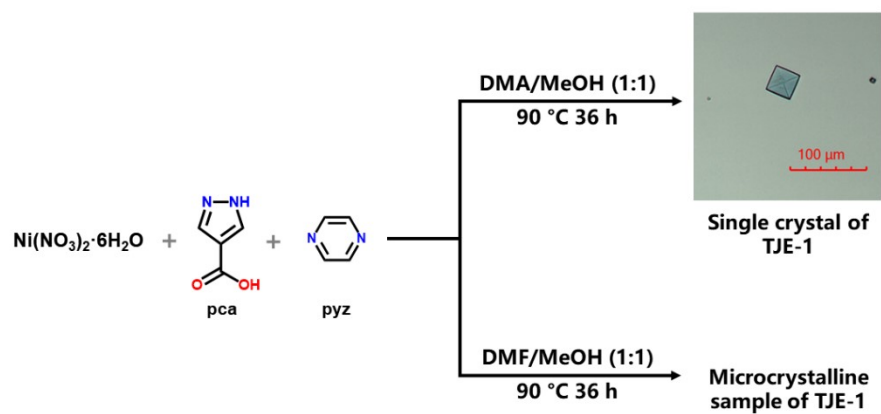

**Figure S1.** Scheme of synthesis of TJE-1 and photo of as-synthesized single crystals under a microscope.

**Table S2.** Crystallographic data and structural refinement summary for TJE-1.

---

|                                            |                                                               |
|--------------------------------------------|---------------------------------------------------------------|
| Chemical formula                           | C <sub>8</sub> H <sub>6</sub> N <sub>4</sub> NiO <sub>2</sub> |
| Formula weight                             | 248.88                                                        |
| Crystal system                             | tetragonal                                                    |
| Space group                                | <i>P4/mbm</i>                                                 |
| <i>a</i> (Å)                               | 13.4433(11)                                                   |
| <i>b</i> (Å)                               | 13.4433(11)                                                   |
| <i>c</i> (Å)                               | 7.1126(11)                                                    |
| $\alpha$ (°)                               | 90                                                            |
| $\beta$ (°)                                | 90                                                            |
| $\gamma$ (°)                               | 90                                                            |
| <i>Volume</i> (Å <sup>3</sup> )            | 1285.4(3)                                                     |
| <i>Z</i>                                   | 4                                                             |
| Temperature (K)                            | 300.00                                                        |
| $\mu$ (mm <sup>-1</sup> )                  | 8.192                                                         |
| $\rho_{\text{calc}}$ (g cm <sup>-3</sup> ) | 1.286                                                         |
| F(000)                                     | 504.0                                                         |
| Radiation                                  | GaK $\alpha$ ( $\lambda = 1.34139$ )                          |
| Reflections collected                      | 9875                                                          |
| Independent reflections                    | 834                                                           |
| Goodness of fit                            | 1.107                                                         |
| Final R indexes ( $I \geq 2\sigma(I)$ )    | R <sub>1</sub> =0.0371, wR <sub>2</sub> =0.1027               |
| Final R indexes (all data)                 | R <sub>1</sub> =0.0446, wR <sub>2</sub> =0.1057               |

---

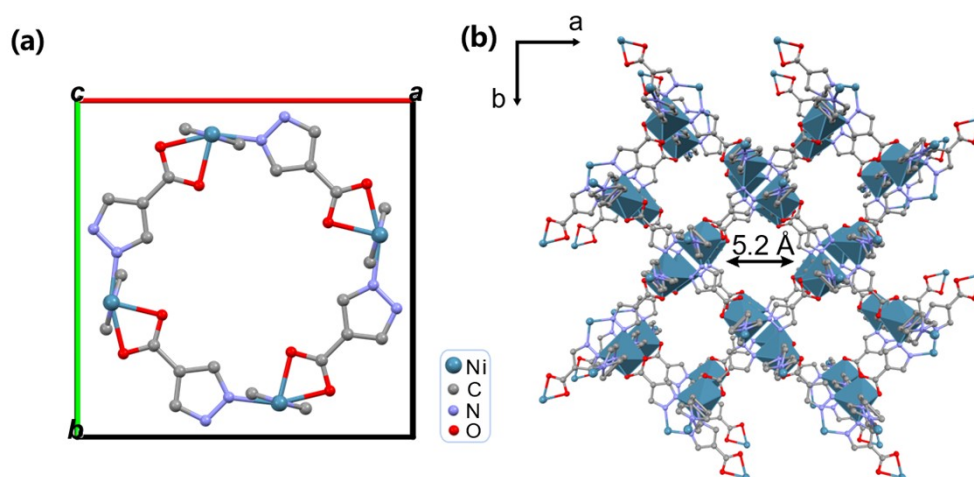

**Figure S2.** Crystal structures of TJE-1. (a) The unit cell of TJE-1 viewed along *c* axis. (b) Microporous channels in TJE-1 viewed along *c* axis (Color code: Ni, cyan; C, gray; N, blue; O, red; H atoms are omitted for clarity. Probe radius: 1.2 Å).

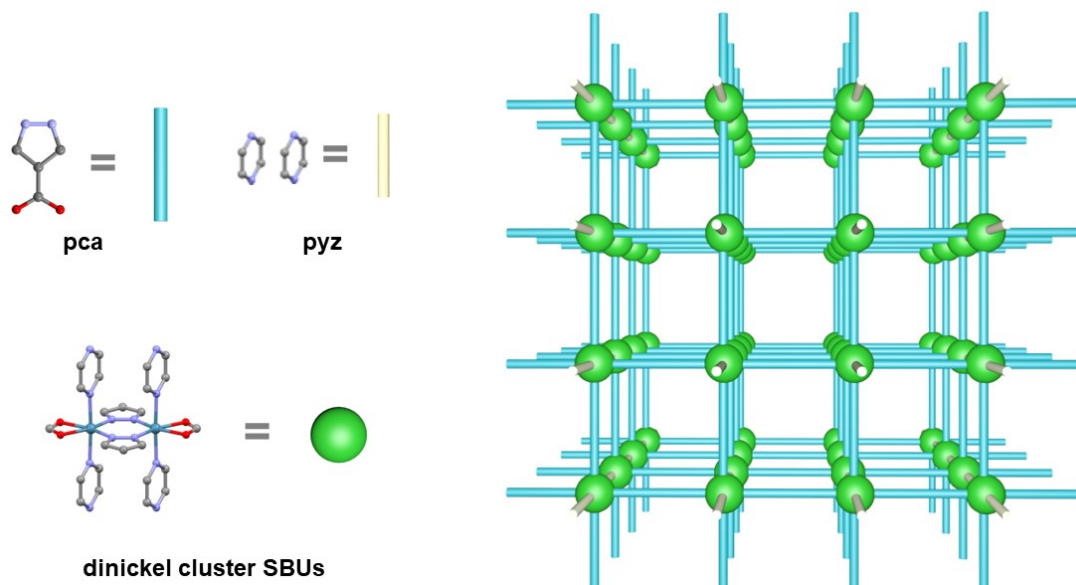

**Figure S3.** Schematic diagram of the network of TJE-1.

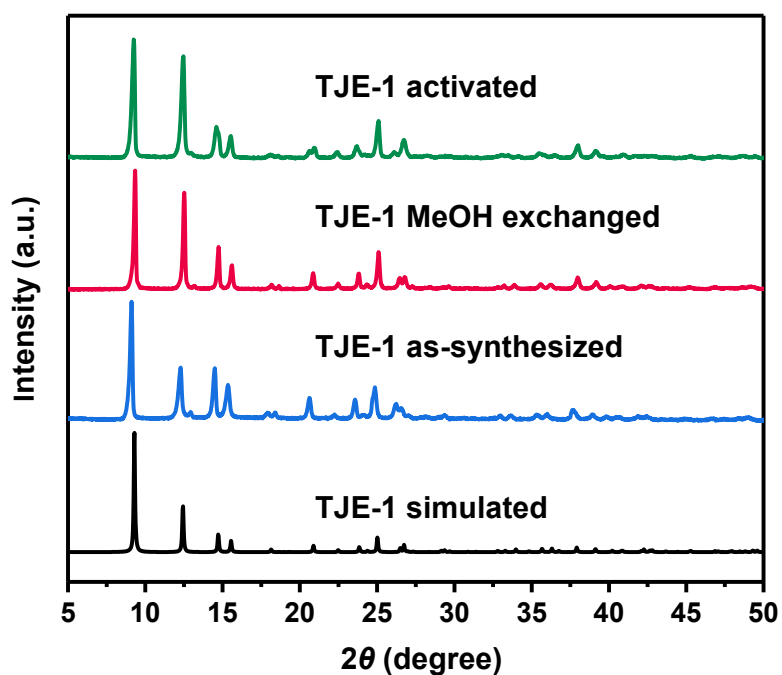

Figure S4. The powder X-ray diffraction (PXRD) patterns of TJE-1.

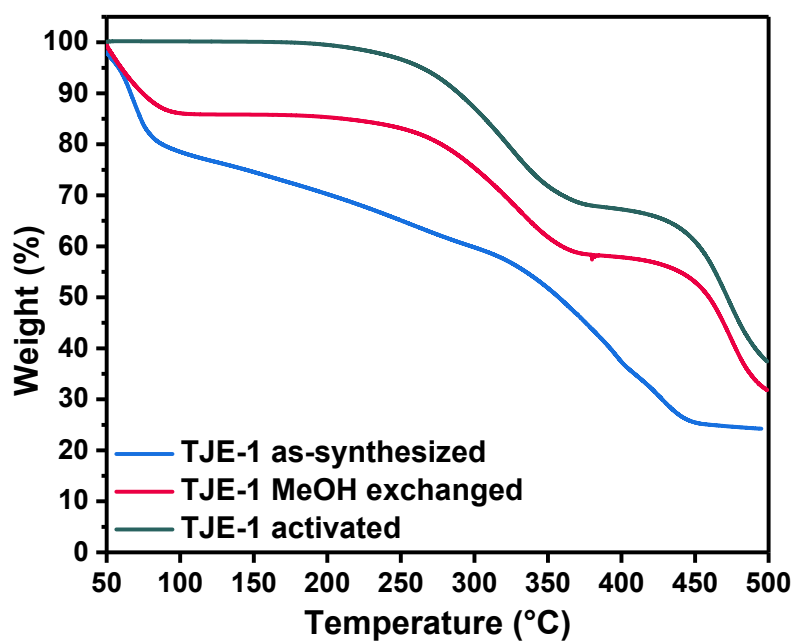

Figure S5. TGA analysis of as-synthesized, MeOH exchanged, and activated TJE-1.

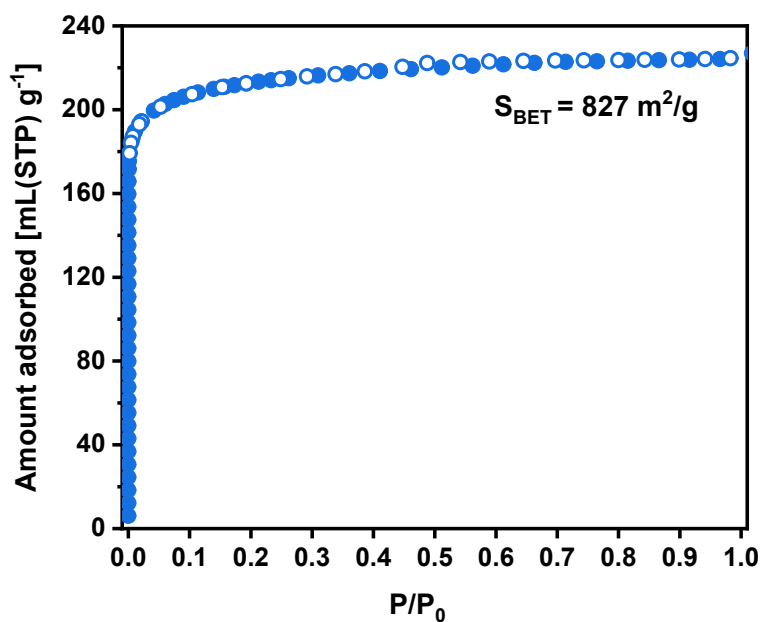

**Figure S6.** N<sub>2</sub> sorption isotherms at 77 K and the Brunauer–Emmett–Teller (BET) surface area of activated TJE-1.

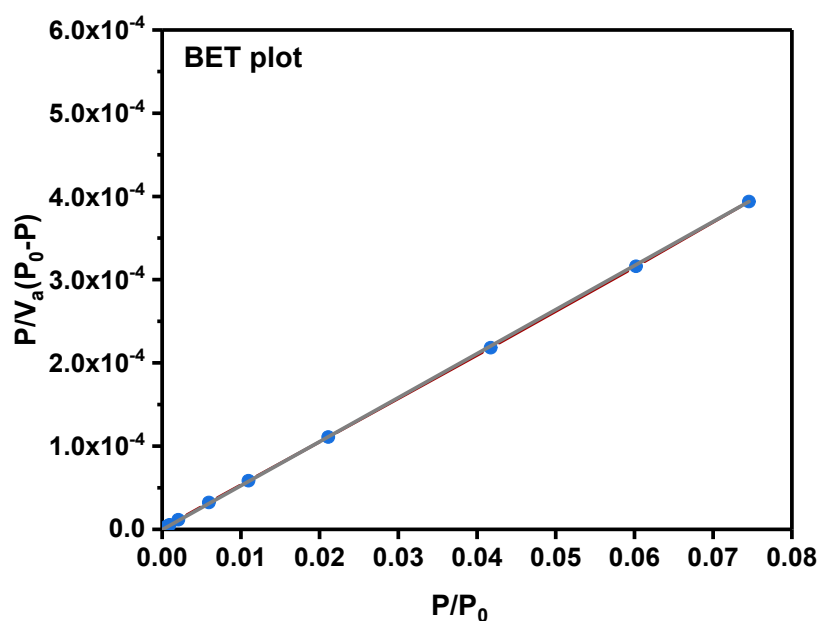

**Figure S7.** Brunauer–Emmett–Teller (BET) plot for surface area calculation of TJE-1 based on N<sub>2</sub> adsorption isotherm at 77 K. (*C* value, 470780; Correlation coefficient, 0.9999; BET surface area, 827 m<sup>2</sup> g<sup>-1</sup>.)

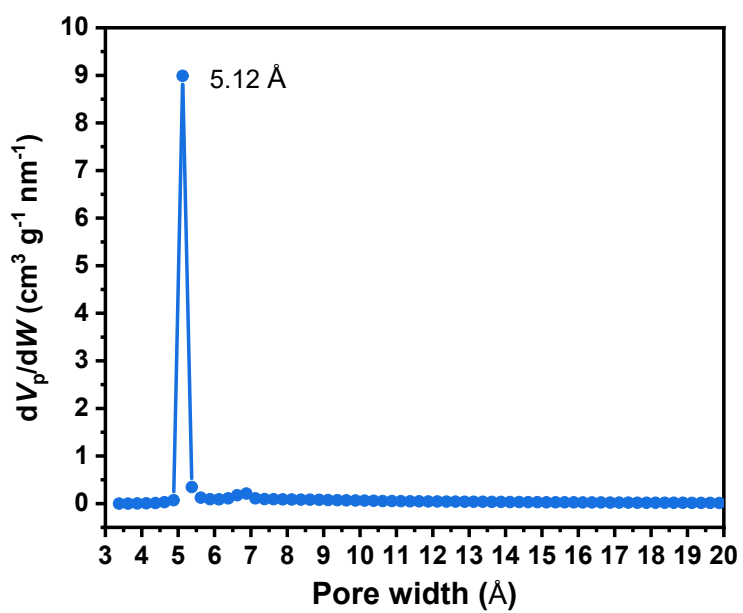

**Figure S8.** Pore size distribution (PSD) of TJE-1 based on the adsorption branch of N<sub>2</sub> adsorption isotherm at 77 K with Horvath–Kawazoe (HK) model.

**Table S3.** Fitting parameters for IAST selectivity calculation

|          | $C_2H_2$ | $C_2H_4$ |
|----------|----------|----------|
| $n_{m1}$ | 3.2658   | 0.9387   |
| $n_{m2}$ | 5.5776   | 5.7641   |
| $b_1$    | 0.1726   | 0.1798   |
| $b_2$    | 0.0148   | 0.0205   |
| $t_1$    | 1.1185   | 0.7960   |
| $t_2$    | 1.2001   | 1.3700   |
| $R^2$    | 0.99997  | 0.99999  |



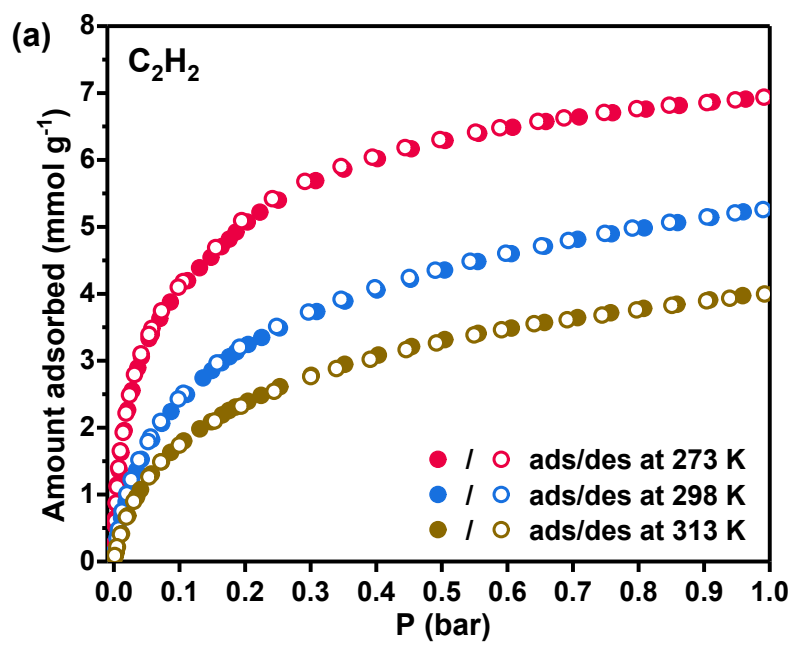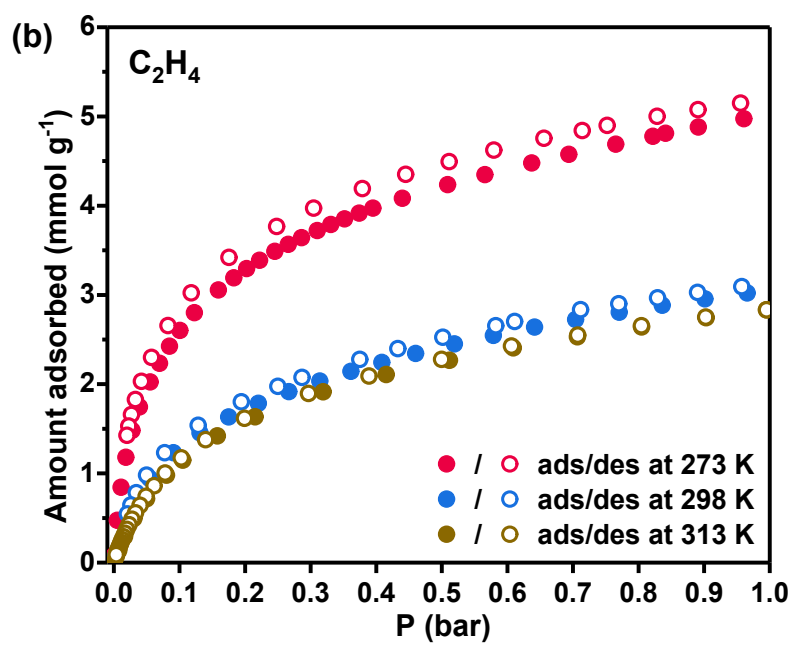

Figure S9.  $C_2H_2$  (a) and  $C_2H_4$  (b) sorption isotherms for TJE-1 at 273 K, 298 K and 313 K.

**Table S4.** Fitting parameters for  $Q_{st}$  calculation

|                | <b>C<sub>2</sub>H<sub>2</sub></b> | <b>C<sub>2</sub>H<sub>4</sub></b> |
|----------------|-----------------------------------|-----------------------------------|
| a <sub>0</sub> | -4271.62596                       | -3520.15                          |
| a <sub>1</sub> | 105.53457                         | -1053.09                          |
| a <sub>2</sub> | -181.26569                        | 941.0122                          |
| a <sub>3</sub> | 39.72881                          | -338.514                          |
| a <sub>4</sub> | -3.41244                          | 33.82942                          |
| a <sub>5</sub> | 0.23188                           | -2.35015                          |
| b <sub>0</sub> | 21.47951                          | 19.88806                          |
| b <sub>1</sub> | 0.08037                           | 3.28655                           |
| b <sub>2</sub> | 0.56961                           | -2.03776                          |
| b <sub>3</sub> | -0.08455                          | 0.5999                            |
| R <sup>2</sup> | 0.99923                           | 0.99303                           |

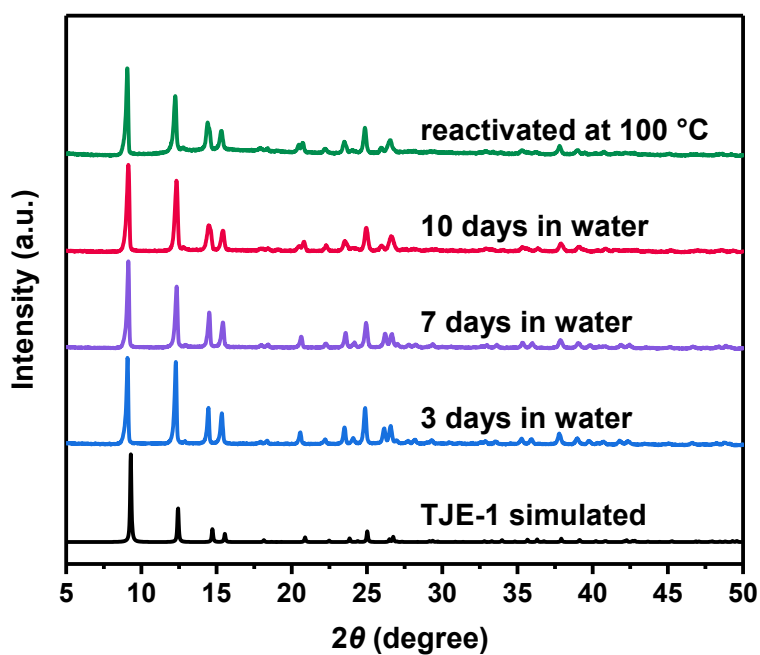

**Figure S10.** The powder X-ray diffraction (PXRD) patterns of TJE-1 after immersion in water for various time, showing the water stability of TJE-1.

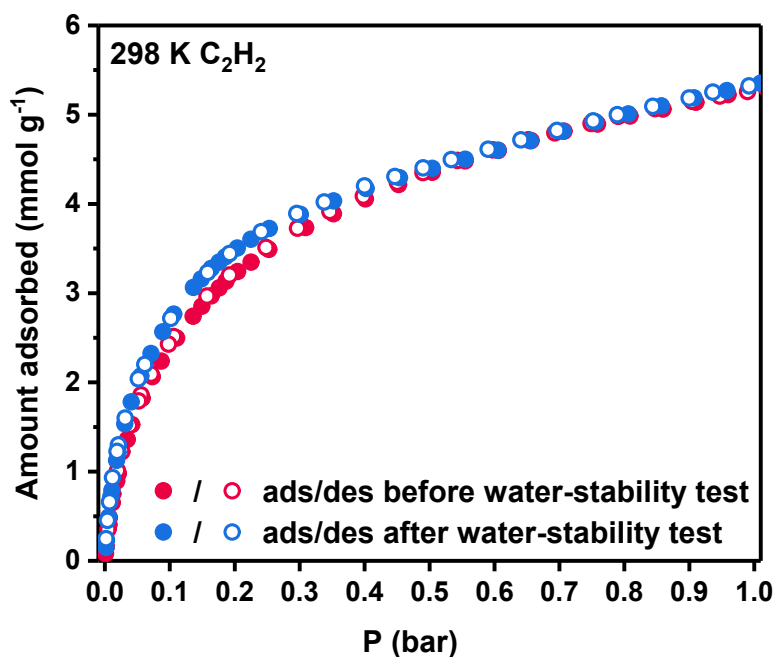

**Figure S11.** The  $C_2H_2$  sorption for TJE-1 reactivated at 100 °C, recorded before and after immersion in water for 10 days. This indicates that the pore structure of TJE-1 remains stable in water.

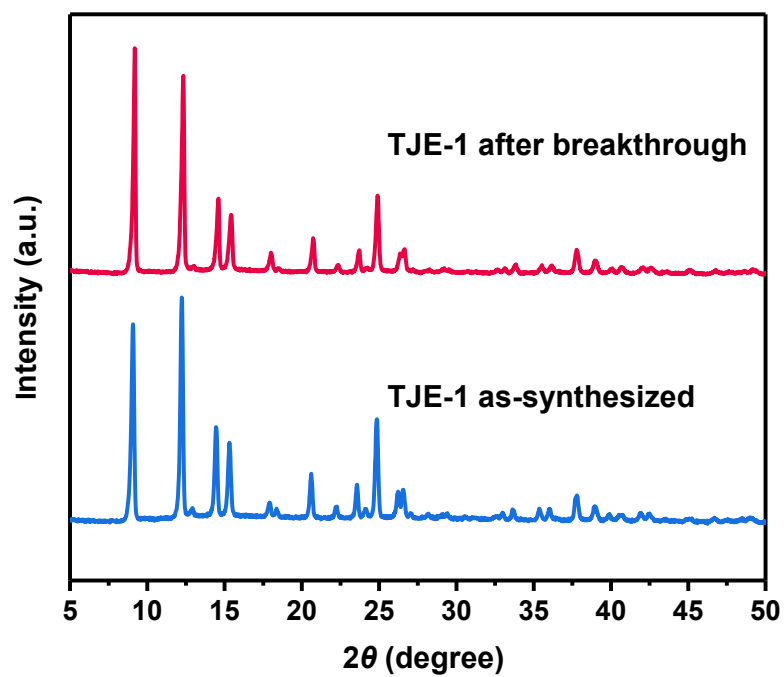

**Figure S12.** PXRD patterns of TJE-1 before and after the breakthrough experiment.

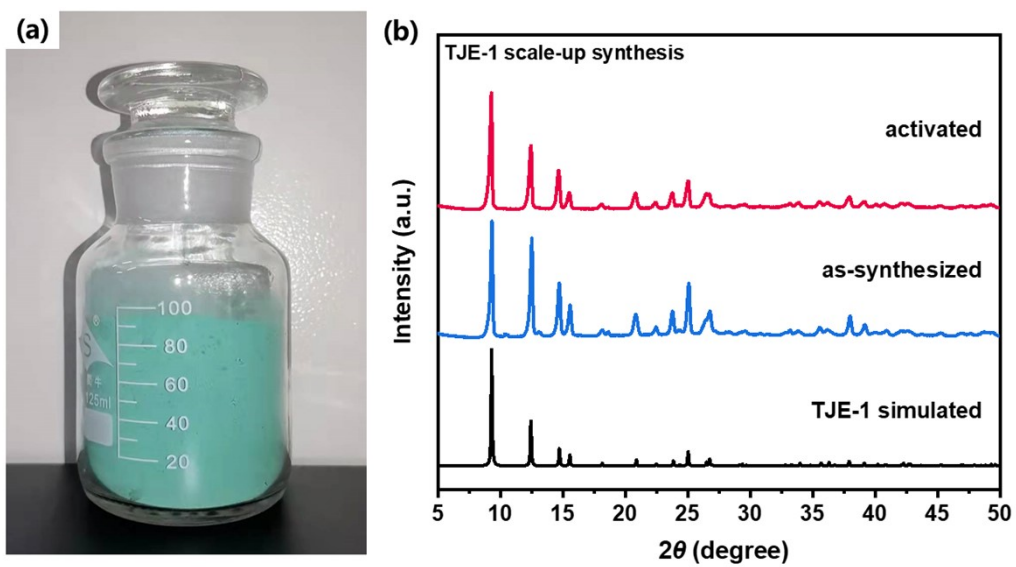

**Figure S13.** (a) Optical photo and (b) powder X-ray diffraction (PXRD) pattern of TJE-1 obtained by scale-up synthesis.

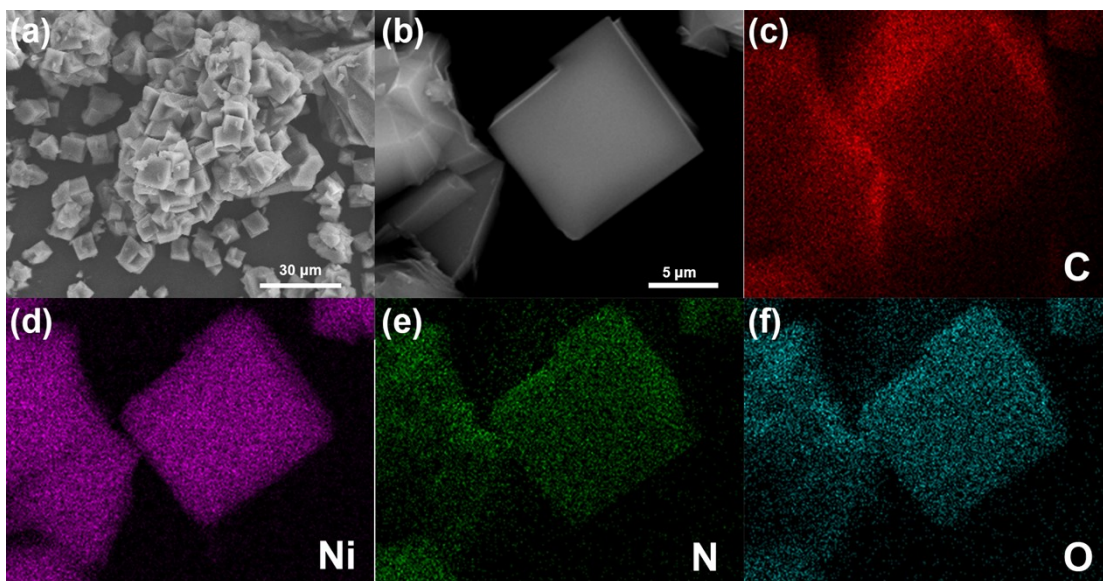

**Figure S14.** (a,b) SEM images of conventionally synthesized TJE-1 microcrystalline. (c-f) EDS mapping of a typical interface of TJE-1. The resolution of the EDS probe used is  $16\text{ nm} \times 16\text{ nm}$ .

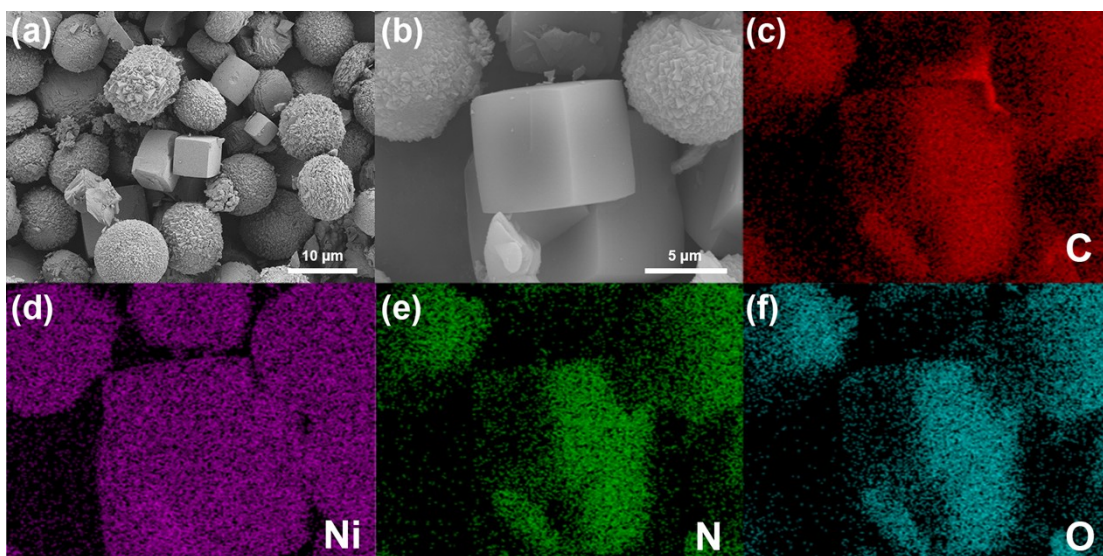

**Figure S15.** (a,b) SEM images of scale-up synthesized TJE-1 samples. (c-f) EDS mapping of a typical interface of TJE-1. The resolution of the EDS probe used is  $16\text{ nm} \times 16\text{ nm}$ .

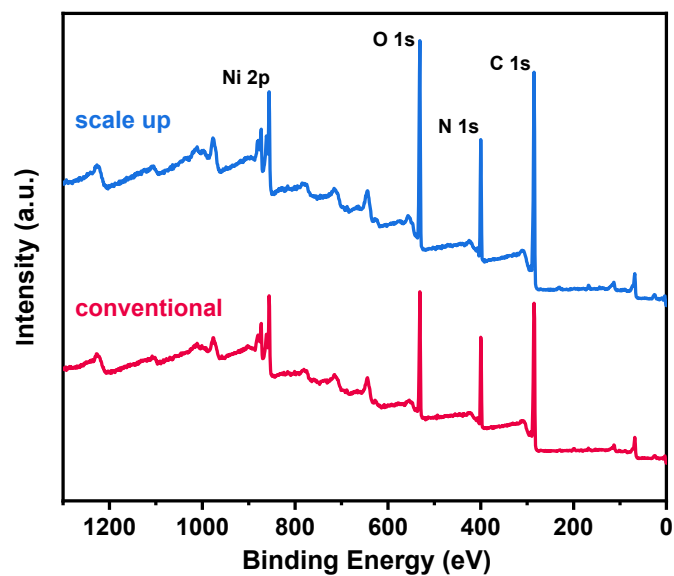

**Figure S16.** XPS survey spectrum of the conventionally synthesized and scale-up synthesized TJE-1.

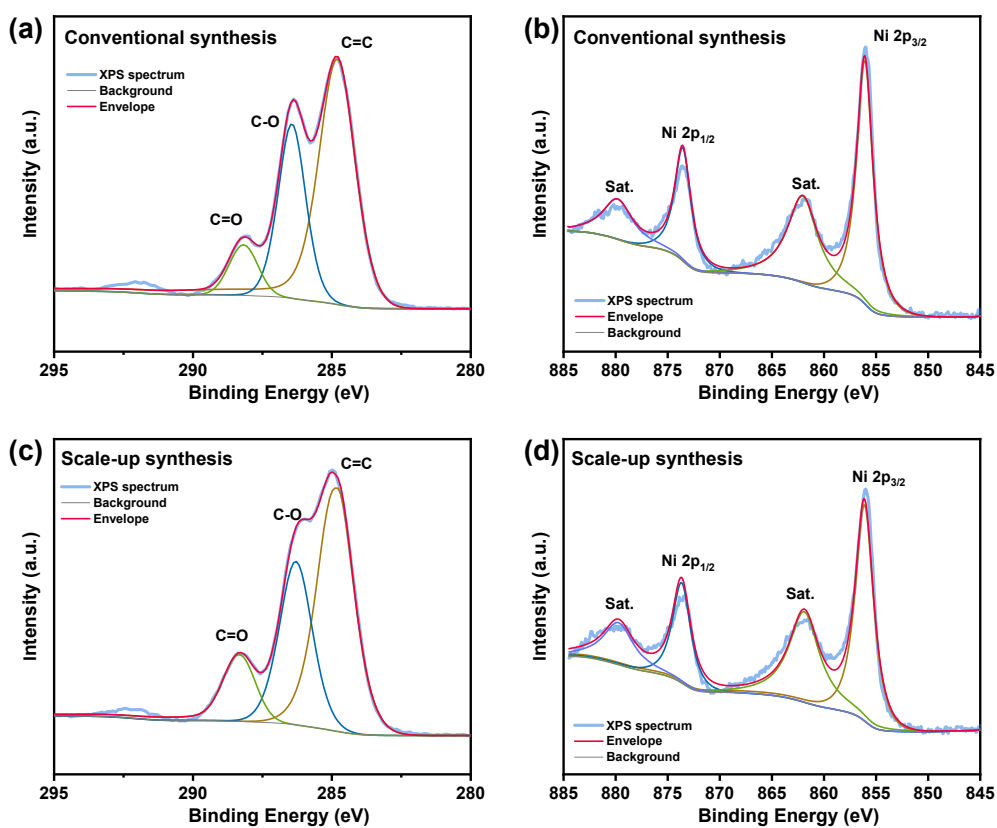

**Figure S17.** XPS spectra of the conventionally synthesized (a,b) and scale-up synthesized (c,d) TJE-1 in the C 1s and Ni 2p region.

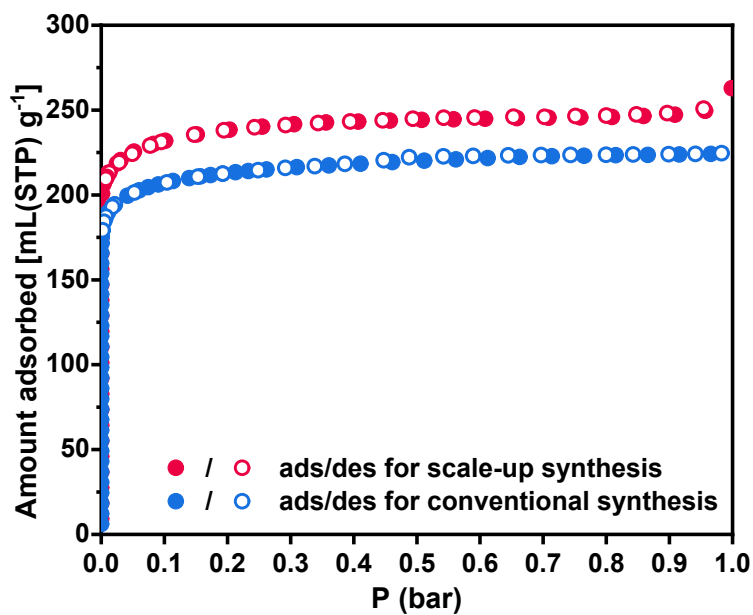

**Figure S18.** N<sub>2</sub> sorption isotherms at 77 K of scale-up synthesized TJE-1.

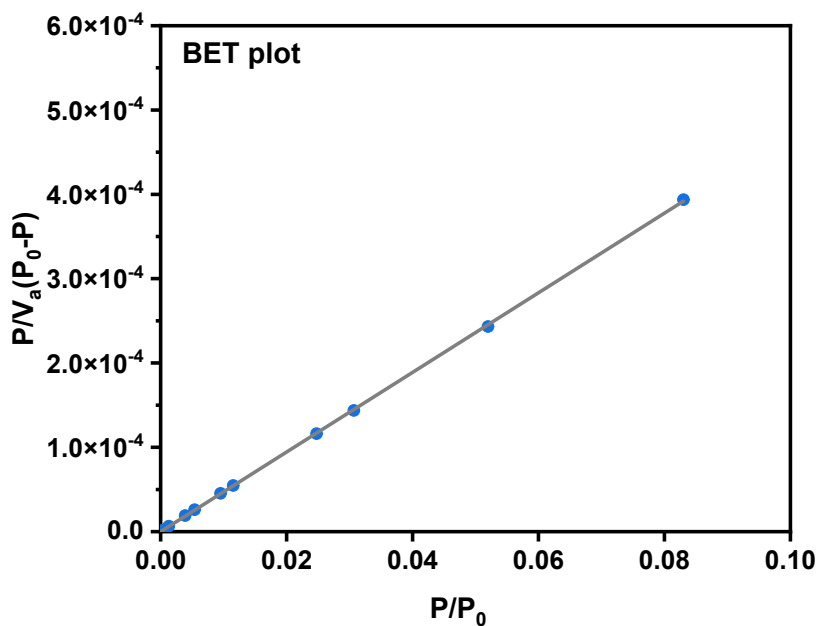

**Figure S19.** BET plot for surface area calculation of scale-up synthesized TJE-1 based on N<sub>2</sub> adsorption isotherm at 77 K. (*C* value, 104650; Correlation coefficient, 0.9999; BET surface area, 922 m<sup>2</sup> g<sup>-1</sup>.)



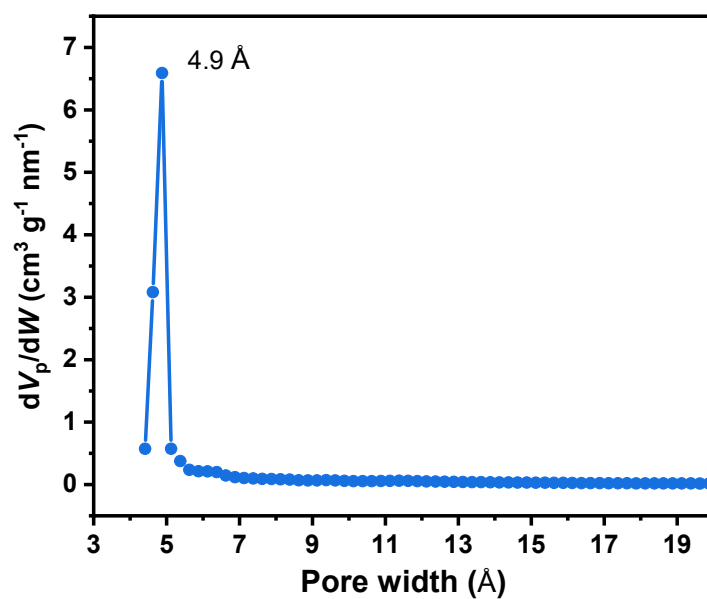

**Figure S20.** PSD of scale-up synthesized TJE-1 based on the adsorption branch of  $\text{N}_2$  adsorption isotherm at 77 K with HK model.

**Table S5.** Comparison of the main precursor costs of TJE-1 and other PCPs for C<sub>2</sub>H<sub>2</sub>/C<sub>2</sub>H<sub>4</sub> separation. \*

| PCPs                  | Main precursors<br>(indicated by CAS number) | Commercial price<br>(\$ g <sup>-1</sup> ) | Cost level | Ref.             |
|-----------------------|----------------------------------------------|-------------------------------------------|------------|------------------|
| UTSA-100              | 2015178-17-1                                 | unavailable                               | very high  | 13               |
| UTSA-200              | 2632-99-7                                    | 116 <sup>c</sup>                          | high       | 14               |
| UTSA-300              | 37968-97-1                                   | 113 <sup>b</sup>                          | high       | 15               |
| SIFSIX-1-Cu           | 553-26-4                                     | 0.7 <sup>a</sup>                          | low        | 16               |
| SIFSIX-3-Zn           | 290-37-9                                     | 0.13 <sup>a</sup>                         | low        | 16               |
| SIFSIX-3-Ni           | 290-37-9                                     | 0.13 <sup>a</sup>                         | low        | 16               |
| SIFSIX-2-Cu-i         | 73564-69-9                                   | 130 <sup>a</sup>                          | high       | 16               |
| Fe-MOF-74             | 610-92-4                                     | 4.8 <sup>a</sup>                          | low        | 17               |
| M <sup>n</sup> MOF-3a | 1373442-99-9                                 | unavailable                               | very high  | 18               |
| NOTT-300              | 4371-28-2                                    | 117 <sup>a</sup>                          | high       | 19               |
| NKMOF-1-Ni            | 1236181-13-7                                 | unavailable                               | very high  | 20               |
| ZU-32                 | 73564-69-9                                   | 130 <sup>a</sup>                          | high       | 21               |
| ZU-33                 | 2632-99-7                                    | 116 <sup>c</sup>                          | high       | 21               |
| TIFSIX-2-Cu-i         | 73564-69-9                                   | 130 <sup>a</sup>                          | high       | 22               |
| TIFSIX-4-Cu-i         | 113682-56-7                                  | 70.6 <sup>a</sup>                         | high       | 22               |
| ZrT-1-tetrazol        | 1010915-67-9                                 | 300 <sup>a</sup>                          | very high  | 23               |
| NbU-1                 | 73-24-5                                      | 0.2 <sup>a</sup>                          | low        | 24               |
| ZJU-74a               | 339527-86-5 and 290-37-9                     | 1.5+0.13 <sup>a</sup>                     | low        | 25               |
| GeFSIX-dps-Cu         | 37968-97-1                                   | 113 <sup>b</sup>                          | high       | 26               |
| ZUL-100               | 37968-97-1                                   | 113 <sup>b</sup>                          | high       | 27               |
| ZUL-200               | 37968-97-1                                   | 113 <sup>b</sup>                          | high       | 27               |
| <b>TJE-1</b>          | <b>37718-11-9 and 290-37-9</b>               | <b>1.45+0.13<sup>a</sup></b>              | <b>low</b> | <b>This work</b> |

\* Only the main organic ligand precursors were listed. The commercial price of laboratory reagents is the lowest price in China collected in January 2023 from three different suppliers [WuXi AppTec Co. Ltd., Tokyo Chemical Industry (Shanghai) Co. Ltd., and Merck KGaA (China) Co. Ltd.] and converted to US dollars.

<sup>a</sup> Provided by WuXi AppTec Co. Ltd.

<sup>b</sup> Provided by Tokyo Chemical Industry (Shanghai) Co. Ltd.

<sup>c</sup> Provided by Merck KGaA (China) Co. Ltd.

**Table S6.** Comparison of TJE-1 and various benchmark PCPs for C<sub>2</sub>H<sub>2</sub>/C<sub>2</sub>H<sub>4</sub> separation. \*

| PCPs           | Functional Sites                                     | C <sub>2</sub> H <sub>2</sub> capacity<br>(mmol g <sup>-1</sup> ) | Selectivity         | $\Delta q$<br>(mol kg <sup>-1</sup> ) | $Q_{st}$ of C <sub>2</sub> H <sub>2</sub><br>(kJ mol <sup>-1</sup> ) | Water<br>stability | Precursors<br>cost | Ref.             |
|----------------|------------------------------------------------------|-------------------------------------------------------------------|---------------------|---------------------------------------|----------------------------------------------------------------------|--------------------|--------------------|------------------|
| UTSA-100       | Free N site, -NH <sub>2</sub>                        | 4.27                                                              | 10.72               | 3.87                                  | 22                                                                   | moderate           | very high          | 13               |
| UTSA-200       | Molecular sieving and SiF <sub>6</sub> <sup>2-</sup> | 3.65                                                              | 6320 <sup>a</sup>   | 3.65                                  | 40                                                                   | moderate           | high               | 14               |
| UTSA-300       | Molecular sieving                                    | 3.41 <sup>b</sup>                                                 | Molecular sieving   | 3.41 <sup>b</sup>                     | 57.6 <sup>b</sup>                                                    | low                | high               | 15               |
| SIFSIX-1-Cu    | SiF <sub>6</sub> <sup>2-</sup>                       | 8.5                                                               | 10.63               | 7.70                                  | 37                                                                   | moderate           | low                | 16               |
| SIFSIX-3-Zn    | SiF <sub>6</sub> <sup>2-</sup>                       | 3.64                                                              | 8.82                | 3.23                                  | 31                                                                   | moderate           | low                | 16               |
| SIFSIX-3-Ni    | SiF <sub>6</sub> <sup>2-</sup>                       | 3.3                                                               | 5.03                | 2.64                                  | 30.5                                                                 | low                | low                | 16               |
| SIFSIX-2-Cu-i  | SiF <sub>6</sub> <sup>2-</sup>                       | 4.02                                                              | 44.54               | 3.93                                  | 41.9                                                                 | moderate           | very high          | 16, 28           |
| Fe-MOF-74      | Open metal sites                                     | 6.8                                                               | 2.08                | 3.53                                  | 47                                                                   | low                | low                | 17               |
| M'MOF-3a       | Molecular sieving                                    | 1.9                                                               | 24.03               | 1.82                                  | 25                                                                   | moderate           | very high          | 18               |
| NOTT-300       | Supramolecular interactions                          | 6.34 <sup>c</sup>                                                 | 2.17 <sup>c</sup>   | 3.42 <sup>c</sup>                     | 32                                                                   | high               | high               | 19               |
| NKMOF-1-Ni     | Open metal sites                                     | 2.72                                                              | 1272.6              | 2.72                                  | 60.3                                                                 | high               | very high          | 20               |
| ZU-32          | GeF <sub>6</sub> <sup>2-</sup>                       | 3.97                                                              | 67                  | 3.91                                  | 42.6                                                                 | moderate           | very high          | 21               |
| ZU-33          | GeF <sub>6</sub> <sup>2-</sup>                       | 3.78                                                              | >1100 <sup>a</sup>  | 3.78                                  | 56.6                                                                 | moderate           | high               | 21               |
| TIFSIX-2-Cu-i  | TiF <sub>6</sub> <sup>2-</sup>                       | 4.1                                                               | 55 <sup>d</sup>     | 4.03 <sup>d</sup>                     | 46.3                                                                 | low                | very high          | 22               |
| TIFSIX-4-Cu-i  | TiF <sub>6</sub> <sup>2-</sup>                       | 4.3                                                               | 11 <sup>d</sup>     | 3.91 <sup>d</sup>                     | 40.8                                                                 | moderate           | high               | 22               |
| ZrT-1-tetrazol | tetrazole N hydrogen bond                            | 2.58                                                              | 4.08                | 1.95                                  | 33.27                                                                | high               | very high          | 23               |
| NbU-1          | Open metal sites                                     | 2.72                                                              | 5.9                 | 2.26                                  | 38.3                                                                 | high               | low                | 24               |
| ZJU-74a        | Oen metal sites                                      | 3.39 <sup>e</sup>                                                 | 24.2 <sup>d,e</sup> | 3.25 <sup>d,e</sup>                   | 45–65 <sup>e</sup>                                                   | high               | moderate           | 25               |
| GeFSIX-dps-Cu  | Molecular Sieving                                    | 4.28                                                              | 40.1 <sup>f</sup>   | 4.17                                  | —                                                                    | high               | high               | 26               |
| ZUL-100        | TiF <sub>6</sub> <sup>2-</sup>                       | 5.31                                                              | 175 <sup>d</sup>    | —                                     | 65.3                                                                 | high               | high               | 27               |
| ZUL-200        | NbOF <sub>5</sub> <sup>2-</sup>                      | 4.69                                                              | 114 <sup>d</sup>    | —                                     | 57.6                                                                 | high               | high               | 27               |
| <b>TJE-1</b>   | <b>O sites, pyz ring</b>                             | <b>5.27</b>                                                       | <b>4.16</b>         | <b>4.00</b>                           | <b>35.5</b>                                                          | <b>high</b>        | <b>low</b>         | <b>This work</b> |

\* Unless otherwise specified, the capacity data are all recorded at 1 bar, 298 K, and selectivity is IAST selectivity for 50/50 (v/v) C<sub>2</sub>H<sub>2</sub>/C<sub>2</sub>H<sub>4</sub> mixtures. The separation potential ( $\Delta q$ ) is for C<sub>2</sub>H<sub>2</sub>/C<sub>2</sub>H<sub>4</sub> (50/50,v/v) at 1 bar, 298 K. Water stability is a qualitative comparison: moderate

stability means stable in humid air, high stability means stable after being soaked in water and low stability means water-sensitive. The precursors costs detail was shown in Table S5.

<sup>a</sup> The value is only for qualitative comparison.

<sup>b</sup> The data was collected at 273 K.

<sup>c</sup> The data was collected at 293 K.

<sup>d</sup> The data was for 1/99 (v/v) C<sub>2</sub>H<sub>2</sub>/C<sub>2</sub>H<sub>4</sub> mixtures.

<sup>e</sup> The data was collected at 296 K.

<sup>f</sup> The data was derived from actual gas desorption processes.

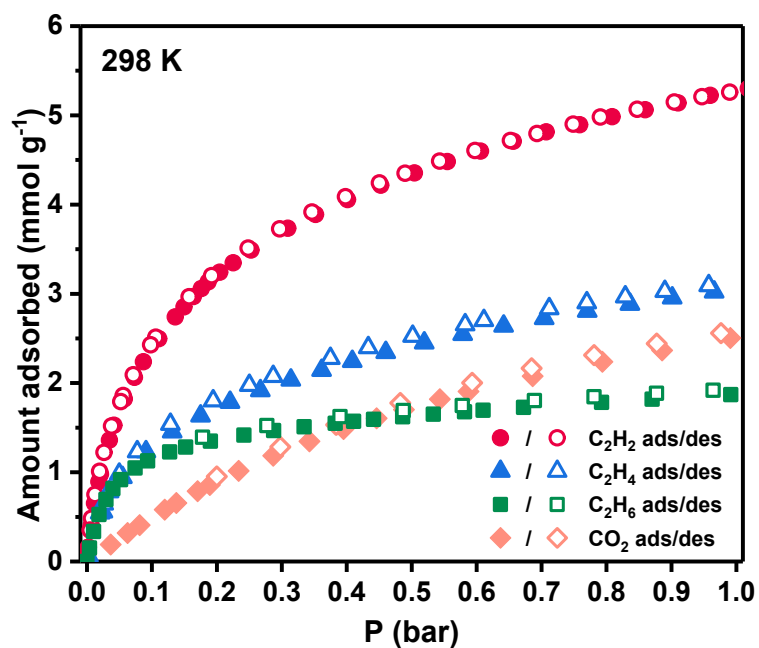

Figure S21.  $C_2H_2$ ,  $C_2H_4$ ,  $C_2H_6$  and  $CO_2$  sorption for TJE-1 at 298 K.

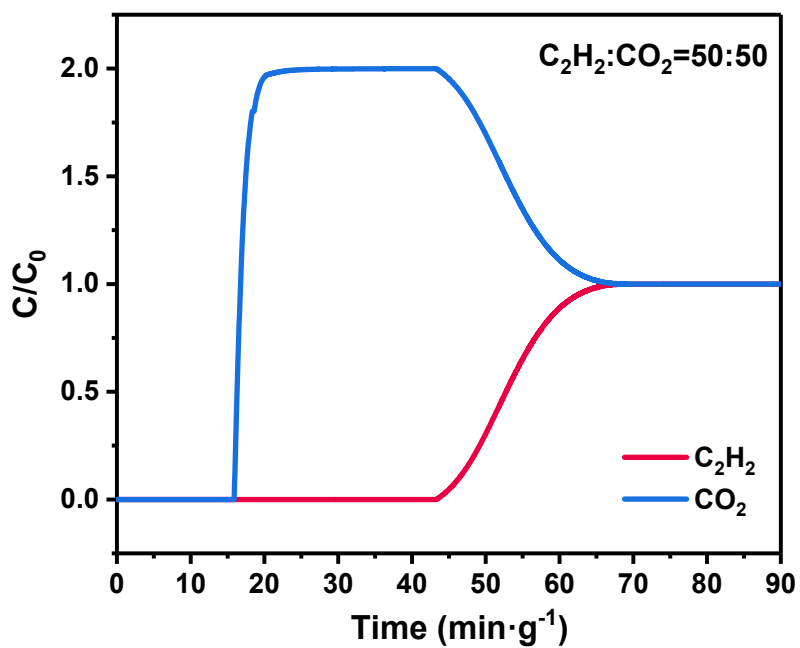

Figure S22. Experimental breakthrough curve of TJE-1 under total flow at  $2 \text{ mL min}^{-1}$  for an equimolar gas mixture of  $C_2H_2$  and  $CO_2$  at 298 K.

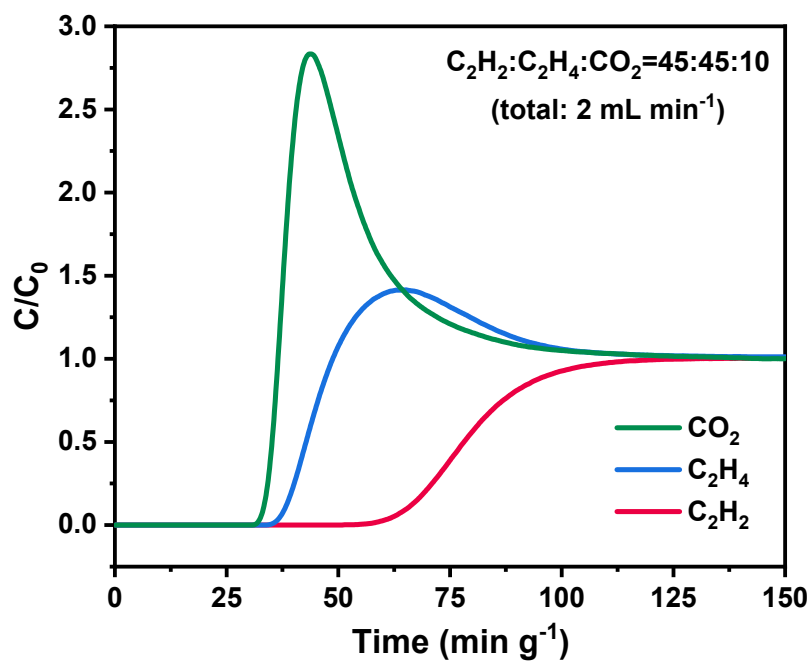

**Figure S23.** Experimental breakthrough curve of TJE-1 under total flow at 2 mL min<sup>-1</sup> for C<sub>2</sub>H<sub>2</sub>/C<sub>2</sub>H<sub>4</sub>/CO<sub>2</sub> (45/45/10,v/v/v) gas mixture at 298 K.

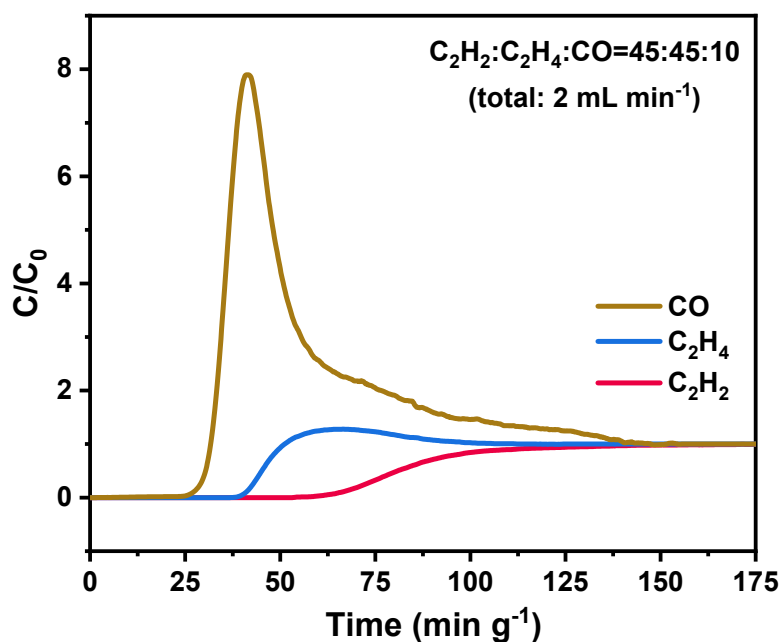

**Figure S24.** Experimental breakthrough curve of TJE-1 under total flow at 2 mL min<sup>-1</sup> for C<sub>2</sub>H<sub>2</sub>/C<sub>2</sub>H<sub>4</sub>/CO (45/45/10,v/v/v) gas mixture at 298 K.

## Reference:

1. A. J. Howarth, A. W. Peters, N. A. Vermeulen, T. C. Wang, J. T. Hupp and O. K. Farha, *Chem. Mater.*, 2017, **29**, 26-39.
2. O. V. Dolomanov, L. J. Bourhis, R. J. Gildea, J. A. K. Howard and H. Puschmann, *J. Appl. Crystallogr.*, 2009, **42**, 339-341.
3. G. Sheldrick, *Acta Crystallographica, Section A*, 2015, **71**, 3-8.
4. G. Sheldrick, *Acta Crystallographica, Section C*, 2015, **71**, 3-8.
5. R. Krishna, *RSC Adv.*, 2017, **7**, 35724-35737.
6. R. Krishna, *ACS Omega*, 2020, **5**, 16987-17004.
7. J. P. Perdew, K. Burke and M. Ernzerhof, *Phys. Rev. Lett.*, 1996, **77**, 3865-3868.
8. G. Kresse and D. Joubert, *Physical Review B*, 1999, **59**, 1758-1775.
9. S. Grimme, J. Antony, S. Ehrlich and H. Krieg, *The Journal of chemical physics*, 2010, **132**, 154104.
10. H. J. Monkhorst and J. D. Pack, *Physical Review B*, 1976, **13**, 5188-5192.
11. S. Mukherjee, D. Sensharma, K.-J. Chen and M. J. Zaworotko, *Chem. Commun.*, 2020, **56**, 10419-10441.
12. L. Yang, S. Qian, X. Wang, X. Cui, B. Chen and H. Xing, *Chem. Soc. Rev.*, 2020, **49**, 5359-5406.
13. T.-L. Hu, H. Wang, B. Li, R. Krishna, H. Wu, W. Zhou, Y. Zhao, Y. Han, X. Wang, W. Zhu, Z. Yao, S. Xiang and B. Chen, *Nat. Commun.*, 2015, **6**, 7328.
14. B. Li, X. Cui, D. O'Nolan, H.-M. Wen, M. Jiang, R. Krishna, H. Wu, R.-B. Lin, Y.-S. Chen, D. Yuan, H. Xing, W. Zhou, Q. Ren, G. Qian, M. J. Zaworotko and B. Chen, *Adv. Mater.*, 2017, **29**, 1704210.
15. R.-B. Lin, L. Li, H. Wu, H. Arman, B. Li, R.-G. Lin, W. Zhou and B. Chen, *J. Am. Chem. Soc.*, 2017, **139**, 8022-8028.
16. X. Cui, K. Chen, H. Xing, Q. Yang, R. Krishna, Z. Bao, H. Wu, W. Zhou, X. Dong, Y. Han, B. Li, Q. Ren, M. J. Zaworotko and B. Chen, *Science*, 2016, **353**, 141-144.
17. D. Bloch Eric, L. Queen Wendy, R. Krishna, M. Zdrozny Joseph, M. Brown Craig and R. Long Jeffrey, *Science*, 2012, **335**, 1606-1610.
18. S.-C. Xiang, Z. Zhang, C.-G. Zhao, K. Hong, X. Zhao, D.-R. Ding, M.-H. Xie, C.-D. Wu, M. C. Das, R. Gill, K. M. Thomas and B. Chen, *Nat. Commun.*, 2011, **2**, 204.
19. S. Yang, A. J. Ramirez-Cuesta, R. Newby, V. Garcia-Sakai, P. Manuel, S. K. Callear, S. I. Campbell, C. C. Tang and M. Schröder, *Nat. Chem.*, 2015, **7**, 121-129.
20. Y.-L. Peng, T. Pham, P. Li, T. Wang, Y. Chen, K.-J. Chen, K. A. Forrest, B. Space, P. Cheng, M. J. Zaworotko and Z. Zhang, *Angew. Chem. Int. Ed.*, 2018, **57**, 10971-10975.
21. Z. Zhang, X. Cui, L. Yang, J. Cui, Z. Bao, Q. Yang and H. Xing, *Ind. Eng. Chem. Res.*, 2018, **57**, 7266-7274.

22. A. Bajpai, D. O'Nolan, D. G. Madden, K.-J. Chen, T. Pham, A. Kumar, M. Lusi, J. J. Perry, B. Space and M. J. Zaworotko, *Chem. Commun.*, 2017, **53**, 11592-11595.
23. W. Fan, S. B. Peh, Z. Zhang, H. Yuan, Z. Yang, Y. Wang, K. Chai, D. Sun and D. Zhao, *Angew. Chem. Int. Ed.*, 2021, **60**, 17338-17343.
24. J. Li, L. Jiang, S. Chen, A. Kirchon, B. Li, Y. Li and H.-C. Zhou, *J. Am. Chem. Soc.*, 2019, **141**, 3807-3811.
25. J. Pei, K. Shao, J.-X. Wang, H.-M. Wen, Y. Yang, Y. Cui, R. Krishna, B. Li and G. Qian, *Adv. Mater.*, 2020, **32**, 1908275.
26. T. Ke, Q. Wang, J. Shen, J. Zhou, Z. Bao, Q. Yang and Q. Ren, *Angew. Chem. Int. Ed.*, 2020, **59**, 12725-12730.
27. J. Shen, X. He, T. Ke, R. Krishna, J. M. van Baten, R. Chen, Z. Bao, H. Xing, M. Dincă, Z. Zhang, Q. Yang and Q. Ren, *Nat. Commun.*, 2020, **11**, 6259.
28. S.-i. Noro, R. Kitaura, M. Kondo, S. Kitagawa, T. Ishii, H. Matsuzaka and M. Yamashita, *J. Am. Chem. Soc.*, 2002, **124**, 2568-2583.
